# Supplementary material for: Evaluation of Adiposity and Cognitive Function in Adults
Source: PubMed Central journal article supplement (PMC8808326; doi:10.1001/jamanetworkopen.2021.46324), 2022-02-01

## Supplemental Online Content

Anand SS, Friedrich MG, Lee DS, et al; Canadian Alliance of Healthy Hearts and Minds (CAHHM) and the Prospective Urban and Rural Epidemiological (PURE) Study Investigators. Evaluation of adiposity and cognitive function in adults. *JAMA Netw Open*. 2022;5(2):e2146324. doi:10.1001/jamanetworkopen.2021.46324

**eTable 1.** STROBE Statement—Checklist of Items That Should Be Included in Reports of Cross-Sectional Studies

**eTable 2.** Effect of Adiposity and Demographics on Cognition, as Measured by the DSST

**eTable 3.** Healthy Cohort: Effect of Adiposity on Cognition, as Measured by the DSST

**eTable 4.** Waist to Hip Ratio Removed From IHRS: Effect of Adiposity on Cognition, as Measured by the DSST

**eFigure.** Consort Diagram

This supplemental material has been provided by the authors to give readers additional information about their work.

**Supplementary e-Table 1: STROBE Statement—Checklist of items that should be included in reports of *cross-sectional studies***

|                              | <b>Item No</b> | <b>Recommendation</b>                                                                                                                                                                | <b>Page No</b>                               |
|------------------------------|----------------|--------------------------------------------------------------------------------------------------------------------------------------------------------------------------------------|----------------------------------------------|
| <b>Title and abstract</b>    | 1              | (a) Indicate the study's design with a commonly used term in the title or the abstract                                                                                               | 2-3 (Abstract)                               |
|                              |                | (b) Provide in the abstract an informative and balanced summary of what was done and what was found                                                                                  |                                              |
| <b>Introduction</b>          |                |                                                                                                                                                                                      |                                              |
| Background/rationale         | 2              | Explain the scientific background and rationale for the investigation being reported                                                                                                 | 4 (Introduction)                             |
| Objectives                   | 3              | State specific objectives, including any prespecified hypotheses                                                                                                                     | 4-5 (Introduction)                           |
| <b>Methods</b>               |                |                                                                                                                                                                                      |                                              |
| Study design                 | 4              | Present key elements of study design early in the paper                                                                                                                              | 5-6( <i>Methods</i> )                        |
| Setting                      | 5              | Describe the setting, locations, and relevant dates, including periods of recruitment, exposure, follow-up, and data collection                                                      | 5 ( <i>Methods</i> )                         |
| Participants                 | 6              | (a) Give the eligibility criteria, and the sources and methods of selection of participants                                                                                          | 5, sFigure 1                                 |
| Variables                    | 7              | Clearly define all outcomes, exposures, predictors, potential confounders, and effect modifiers. Give diagnostic criteria, if applicable                                             | 5-6 ( <i>Methods, Statistical Analysis</i> ) |
| Data sources/<br>measurement | 8*             | For each variable of interest, give sources of data and details of methods of assessment (measurement). Describe comparability of assessment methods if there is more than one group | 5-6 ( <i>Methods, Statistical Analysis</i> ) |
| Bias                         | 9              | Describe any efforts to address potential sources of bias                                                                                                                            | 7 (Methods, Statistical Analysis)            |
| Study size                   | 10             | Explain how the study size was arrived at                                                                                                                                            | sFigure1                                     |
| Quantitative variables       | 11             | Explain how quantitative variables were handled in the analyses. If applicable, describe which groupings were chosen and why                                                         | 7 (Statistical Analysis)                     |
| Statistical methods          | 12             | (a) Describe all statistical methods, including those used to control for confounding                                                                                                | 7 (Statistical Analysis)                     |
|                              |                | (b) Describe any methods used to examine subgroups and interactions                                                                                                                  | 7 (Statistical Analysis)                     |
|                              |                | (c) Explain how missing data were addressed                                                                                                                                          | 7 (Statistical analysis)                     |
|                              |                | (d) If applicable, describe analytical methods taking account of sampling strategy                                                                                                   | 7 (Statistical analysis)                     |
|                              |                | (e) Describe any sensitivity analyses                                                                                                                                                | 7 (Statistical analysis)                     |

**Results**

|                          | <b>Item No</b> | <b>Recommendation</b>                                                                                                                                                                                        | <b>Page No</b>                                      |
|--------------------------|----------------|--------------------------------------------------------------------------------------------------------------------------------------------------------------------------------------------------------------|-----------------------------------------------------|
| Participants             | 13*            | (a) Report numbers of individuals at each stage of study—eg numbers potentially eligible, examined for eligibility, confirmed eligible, included in the study, completing follow-up, and analysed            | sFigure1                                            |
|                          |                | (b) Give reasons for non-participation at each stage                                                                                                                                                         | sFigure1                                            |
|                          |                | (c) Consider use of a flow diagram                                                                                                                                                                           | sFigure1                                            |
| Descriptive data         | 14*            | (a) Give characteristics of study participants (eg demographic, clinical, social) and information on exposures and potential confounders                                                                     | Table 1                                             |
|                          |                | (b) Indicate number of participants with missing data for each variable of interest                                                                                                                          | Tables present these.                               |
| Outcome data             | 15*            | Report numbers of outcome events or summary measures                                                                                                                                                         | Page 8 (results)                                    |
| Main results             | 16             | (a) Give unadjusted estimates and, if applicable, confounder-adjusted estimates and their precision (eg, 95% confidence interval). Make clear which confounders were adjusted for and why they were included | Presented in all results and tables.                |
|                          |                | (b) Report category boundaries when continuous variables were categorized                                                                                                                                    | Tables 2-3                                          |
|                          |                | (c) If relevant, consider translating estimates of relative risk into absolute risk for a meaningful time period                                                                                             | Pages 8-9 (Results)                                 |
| Other analyses           | 17             | Report other analyses done—eg analyses of subgroups and interactions, and sensitivity analyses                                                                                                               | Page 9 (Results, “Multivariable prediction models”) |
| <b>Discussion</b>        |                |                                                                                                                                                                                                              |                                                     |
| Key results              | 18             | Summarise key results with reference to study objectives                                                                                                                                                     | Page 9-10                                           |
| Limitations              | 19             | Discuss limitations of the study, taking into account sources of potential bias or imprecision. Discuss both direction and magnitude of any potential bias                                                   | Page 12                                             |
| Interpretation           | 20             | Give a cautious overall interpretation of results considering objectives, limitations, multiplicity of analyses, results from similar studies, and other relevant evidence                                   | Page 12, Conclusion                                 |
| Generalisability         | 21             | Discuss the generalisability (external validity) of the study results                                                                                                                                        | Page 12                                             |
| <b>Other information</b> |                |                                                                                                                                                                                                              |                                                     |
| Funding                  | 22             | Give the source of funding and the role of the funders for the present study and, if applicable, for the original study on which the present article is based                                                | Page 14-15.                                         |

\*Give information separately for exposed and unexposed groups.

**Note:** An Explanation and Elaboration article discusses each checklist item and gives methodological background and published examples of transparent reporting. The STROBE checklist is best used in conjunction with this article (freely available on the Web sites of PLoS Medicine at <http://www.plosmedicine.org/>, Annals of Internal Medicine at <http://www.annals.org/>, and Epidemiology at <http://www.epidem.com/>). Information on the STROBE Initiative is available at [www.strobe-statement.org](http://www.strobe-statement.org).

### Supplementary e-Table 2: Effect of Adiposity and demographics on Cognition, as measured by the DSST

|                                              | Model 1<br>DSST with continuous<br>BF% |         | Model 2<br>DSST with BF%<br>quartiles |         | Model 3<br>DSST with continuous<br>VAT |         | Model 4<br>DSST with VAT<br>quartiles |         |                                                |
|----------------------------------------------|----------------------------------------|---------|---------------------------------------|---------|----------------------------------------|---------|---------------------------------------|---------|------------------------------------------------|
|                                              | Mean Score<br>effect<br>(95% CI)       | P-value | Mean Score<br>effect<br>(95% CI)      | P-value | Mean Score<br>effect<br>(95% CI)       | P-value | Mean Score<br>effect<br>(95% CI)      | P-value |                                                |
| Age (per 10 years)                           | -7.1 (-7.4,-6.8)                       | <.0001  | -7.1 (-7.5,-6.8)                      | <.0001  | -6.9 (-7.2,-6.5)                       | <.0001  | -6.9 (-7.3,-6.5)                      | <.0001  | Age (per 10 years)                             |
| Women                                        | 8.4 (7.5,9.4)                          | <.0001  | 7.6 (6.8,8.4)                         | <.0001  | 7.8 (6.8,8.7)                          | <.0001  | 8.2 (7.2,9.1)                         | <.0001  | Women                                          |
| High School or less vs<br>College/University | -5.0 (-5.7,-4.2)                       | <.0001  | -5.0 (-5.7,-4.2)                      | <.0001  | -4.6 (-5.6,-3.7)                       | <.0001  | -4.6 (-5.6,-3.7)                      | <.0001  | High School or less vs<br>College/University   |
| Trade/Vocational vs<br>College/University    | -4.7 (-5.7,-3.8)                       | <.0001  | -4.7 (-5.6,-3.8)                      | <.0001  | -3.4 (-4.5,-2.3)                       | <.0001  | -3.5 (-4.5,-2.4)                      | <.0001  | Trade or Vocational vs<br>College/University   |
| IHRS (per 5 unit change)                     | -0.8 (-1.1,-0.6)                       | <.0001  | -0.8 (-1.1,-0.5)                      | <.0001  | -0.6 (-1.0,-0.3)                       | <.0001  | -0.7 (-1.0,-0.3)                      | <.0001  | IHRS (per 5 unit change)                       |
| Vascular Brain Injury                        | -1.4 (-2.4,-0.5)                       | 0.003   | -1.4 (-2.4,-0.5)                      | 0.003   | -1.3 (-2.5,-0.2)                       | 0.02    | -1.3 (-2.5,-0.2)                      | 0.03    | Vascular Brain Injury                          |
| Height (cm)                                  | 0.1 (0.1,0.2)                          | <.0001  | 0.1 (0.1,0.2)                         | <.0001  | 0.1 (0.1,0.2)                          | <.0001  | 0.1 (0.1,0.2)                         | <.0001  | Height (cm)                                    |
| BF% (per 1 SD increase)                      | -0.8 (-1.1,-0.4)                       | <.0001  |                                       |         | -0.8 (-1.2,-0.4)                       | <.0001  |                                       |         | Visceral Adipose Tissue<br>(per 1 SD increase) |
| BF% quartile 2 vs 1                          |                                        |         | -0.4 (-1.2,0.3)                       | 0.25    |                                        |         | -0.3 (-1.2,0.6)                       | 0.57    | VAT quartile 2 vs 1                            |
| BF% quartile 3 vs 1                          |                                        |         | -0.5 (-1.3,0.3)                       | 0.19    |                                        |         | -0.4 (-1.4,0.5)                       | 0.35    | VAT quartile 3 vs 1                            |

|                     | <b>Model 1</b><br>DSST with continuous<br>BF% |                | <b>Model 2</b><br>DSST with BF%<br>quartiles |                | <b>Model 3</b><br>DSST with continuous<br>VAT |                | <b>Model 4</b><br>DSST with VAT<br>quartiles |                |                     |
|---------------------|-----------------------------------------------|----------------|----------------------------------------------|----------------|-----------------------------------------------|----------------|----------------------------------------------|----------------|---------------------|
|                     | <b>Mean Score<br/>effect<br/>(95% CI)</b>     | <b>P-value</b> | <b>Mean Score<br/>effect<br/>(95% CI)</b>    | <b>P-value</b> | <b>Mean Score<br/>effect<br/>(95% CI)</b>     | <b>P-value</b> | <b>Mean Score<br/>effect<br/>(95% CI)</b>    | <b>P-value</b> |                     |
| BF% quartile 4 vs 1 |                                               |                | -2.0 (-2.8,-1.1)                             | <.0001         |                                               |                | -2.0 (-3.0,-0.9)                             | <0.001         | VAT quartile 4 vs 1 |

Models 1 and 2 assessing BF% exposure, N=8935; Mixed models adjusted for ethnicity (fixed) and recruiting centre (random intercepts). Column 1 defines co-variates and categories of BF%.

Models 3 and 4 assessing VAT exposure, N=6,586; Mixed models adjusted for ethnicity (fixed) and recruiting centre (random intercepts). Column 10 defines co-variates and categories of VAT.

Cut points for BF% quartiles are: 20.6, 24.8 and 29.3 for men; 30.3, 35.8 and 41.4 for women.  
Cut points for VAT quartiles are: 54.3, 76.9 and 105.5 for men; 39.5, 54.6 and 76.7 for women.

**e-Table 3 Healthy Cohort: Effect of Adiposity on Cognition, as measured by the DSST**

|                                              | Model 1<br>DSST with continuous<br>BF% |         | Model 2<br>DSST with BF%<br>quartiles |         | Model 3<br>DSST with continuous<br>VAT |         | Model 4<br>DSST with VAT<br>quartiles |         |                                                |
|----------------------------------------------|----------------------------------------|---------|---------------------------------------|---------|----------------------------------------|---------|---------------------------------------|---------|------------------------------------------------|
|                                              | Mean Score<br>effect<br>(95% CI)       | P-value | Mean Score<br>effect<br>(95% CI)      | P-value | Mean Score<br>effect<br>(95% CI)       | P-value | Mean Score<br>effect<br>(95% CI)      | P-value |                                                |
| Age (per 10 years)                           | -7.0 (-7.4,-6.6)                       | <0.001  | -7.0 (-7.4,-6.6)                      | <0.001  | -6.7 (-7.2,-6.2)                       | <0.001  | -6.7 (-7.2,-6.2)                      | <0.001  | Age (per 10 years)                             |
| Women                                        | 8.5 (7.3,9.8)                          | <0.001  | 8.1 (7.0,9.1)                         | <0.001  | 8.1 (6.9,9.3)                          | <0.001  | 8.5 (7.2,9.7)                         | <0.001  | Women                                          |
| High School or less vs<br>College/University | -5.2 (-6.3,-4.2)                       | <0.001  | -5.2 (-6.2,-4.1)                      | <0.001  | -4.9 (-6.2,-3.6)                       | <0.001  | -4.9 (-6.2,-3.6)                      | <0.001  | High School or less vs<br>College/University   |
| Trade/Vocational vs<br>College/University    | -4.4 (-5.7,-3.1)                       | <0.001  | -4.4 (-5.7,-3.1)                      | <0.001  | -3.1 (-4.5,-1.6)                       | <0.001  | -3.1 (-4.6,-1.6)                      | <0.001  | Trade or Vocational vs<br>College/University   |
| IHRS (per 5 unit change)                     | -1.2 (-1.7,-0.8)                       | <0.001  | -1.2 (-1.6,-0.7)                      | <0.001  | -0.9 (-1.5,-0.4)                       | <0.001  | -0.9 (-1.4,-0.4)                      | <0.001  | IHRS (per 5 unit change)                       |
| Vascular Brain Injury                        | -1.1 (-2.5,0.4)                        | 0.16    | -1.1 (-2.5,0.4)                       | 0.15    | -0.8 (-2.6,0.9)                        | 0.34    | -0.8 (-2.5,0.9)                       | 0.37    | Vascular Brain Injury                          |
| Height (cm)                                  | 0.1 (0.1,0.2)                          | <0.001  | 0.1 (0.1,0.2)                         | <0.001  | 0.1 (0.1,0.2)                          | <0.001  | 0.1 (0.1,0.2)                         | <0.001  | Height (cm)                                    |
| BF% (per 1 SD increase)                      | -0.5 (-0.9,0.0)                        | 0.05    |                                       |         | -0.6 (-1.2,-0.1)                       | 0.03    |                                       |         | Visceral Adipose Tissue<br>(per 1 SD increase) |
| BF% quartile 2 vs 1                          |                                        |         | -0.3 (-1.2,0.6)                       | 0.54    |                                        |         | -0.4 (-1.5,0.7)                       | 0.46    | VAT quartile 2 vs 1                            |
| BF% quartile 3 vs 1                          |                                        |         | -0.5 (-1.5,0.5)                       | 0.36    |                                        |         | -0.3 (-1.4,0.9)                       | 0.64    | VAT quartile 3 vs 1                            |
| BF% quartile 4 vs 1                          |                                        |         | -1.8 (-2.9,-0.7)                      | 0.002   |                                        |         | -2.0 (-3.4,-0.7)                      | 0.003   | VAT quartile 4 vs 1                            |

Models 1 and 2 assessing BF% exposure, N=5,386; Mixed models adjusted for ethnicity (fixed) and recruiting centre (random intercepts); Column 1 defines co-variables and categories of BF%.

Models 3 and 4 assessing VAT exposure, N=4,069; Mixed models adjusted for ethnicity (fixed) and recruiting centre (random intercepts). Column 10 defines co-variables and categories of VAT.

**e-Table 4 Waist to Hip Ratio Removed from IHRs: Effect of Adiposity on Cognition, as measured by the DSST**

|                                              | Model 1<br>DSST with continuous<br>BF% |         | Model 2<br>DSST with BF%<br>quartiles |         | Model 3<br>DSST with continuous<br>VAT |         | Model 4<br>DSST with VAT<br>quartiles |         |                                                |
|----------------------------------------------|----------------------------------------|---------|---------------------------------------|---------|----------------------------------------|---------|---------------------------------------|---------|------------------------------------------------|
|                                              | Mean Score<br>effect<br>(95% CI)       | P-value | Mean Score<br>effect<br>(95% CI)      | P-value | Mean Score<br>effect<br>(95% CI)       | P-value | Mean Score<br>effect<br>(95% CI)      | P-value |                                                |
| Age (per 10 years)                           | -7.1 (-7.5,-6.8)                       | <0.001  | -7.1 (-7.5,-6.8)                      | <0.001  | -6.9 (-7.3,-6.5)                       | <0.001  | -6.9 (-7.3,-6.5)                      | <0.001  | Age (per 10 years)                             |
| Women                                        | 8.9 (8.0,9.8)                          | <0.001  | 7.9 (7.1,8.7)                         | <0.001  | 7.9 (7.0,8.9)                          | <0.001  | 8.4 (7.5,9.4)                         | <0.001  | Women                                          |
| High School or less vs<br>College/University | -5.0 (-5.8,-4.3)                       | <0.001  | -5.0 (-5.8,-4.3)                      | <0.001  | -4.7 (-5.6,-3.7)                       | <0.001  | -4.7 (-5.6,-3.7)                      | <0.001  | High School or less vs<br>College/University   |
| Trade/Vocational vs<br>College/University    | -4.8 (-5.7,-3.8)                       | <0.001  | -4.7 (-5.7,-3.8)                      | <0.001  | -3.4 (-4.5,-2.4)                       | <0.001  | -3.5 (-4.6,-2.4)                      | <0.001  | Trade or Vocational vs<br>College/University   |
| IHRs (per 5 unit change)                     | -0.8 (-1.1,-0.5)                       | <0.001  | -0.8 (-1.1,-0.5)                      | <0.001  | -0.6 (-0.9,-0.3)                       | <0.001  | -0.6 (-0.9,-0.3)                      | <0.001  | IHRs (per 5 unit change)                       |
| Vascular Brain Injury                        | -1.5 (-2.4,-0.5)                       | 0.002   | -1.5 (-2.4,-0.5)                      | 0.002   | -1.3 (-2.5,-0.2)                       | 0.02    | -1.3 (-2.5,-0.2)                      | 0.02    | Vascular Brain Injury                          |
| Height (cm)                                  | 0.1 (0.1,0.2)                          | <0.001  | 0.1 (0.1,0.2)                         | <0.001  | 0.1 (0.1,0.2)                          | <0.001  | 0.1 (0.1,0.2)                         | <0.001  | Height (cm)                                    |
| BF% (per 1 SD increase)                      | -0.9 (-1.2,-0.5)                       | <0.001  |                                       |         | -0.9 (-1.2,-0.5)                       | <0.001  |                                       |         | Visceral Adipose Tissue<br>(per 1 SD increase) |
| BF% quartile 2 vs 1                          |                                        |         | -0.5 (-1.3,0.2)                       | 0.18    |                                        |         | -0.3 (-1.2,0.6)                       | 0.49    | VAT quartile 2 vs 1                            |
| BF% quartile 3 vs 1                          |                                        |         | -0.7 (-1.5,0.1)                       | 0.09    |                                        |         | -0.6 (-1.5,0.4)                       | 0.23    | VAT quartile 3 vs 1                            |
| BF% quartile 4 vs 1                          |                                        |         | -2.2 (-3.0,-1.4)                      | <0.001  |                                        |         | -2.2 (-3.2,-1.2)                      | <0.001  | VAT quartile 4 vs 1                            |

Models 1 and 2 assessing BF% exposure, N=8,935; Mixed models adjusted for ethnicity (fixed) and recruiting centre (random intercepts); Column 1 defines co-variates and categories of BF%.  
 Models 3 and 4 assessing VAT exposure, N=6,586; Mixed models adjusted for ethnicity (fixed) and recruiting centre (random intercepts); Column 10 defines co-variates and categories of VAT.

**e-Figure 1: Consort Diagram**

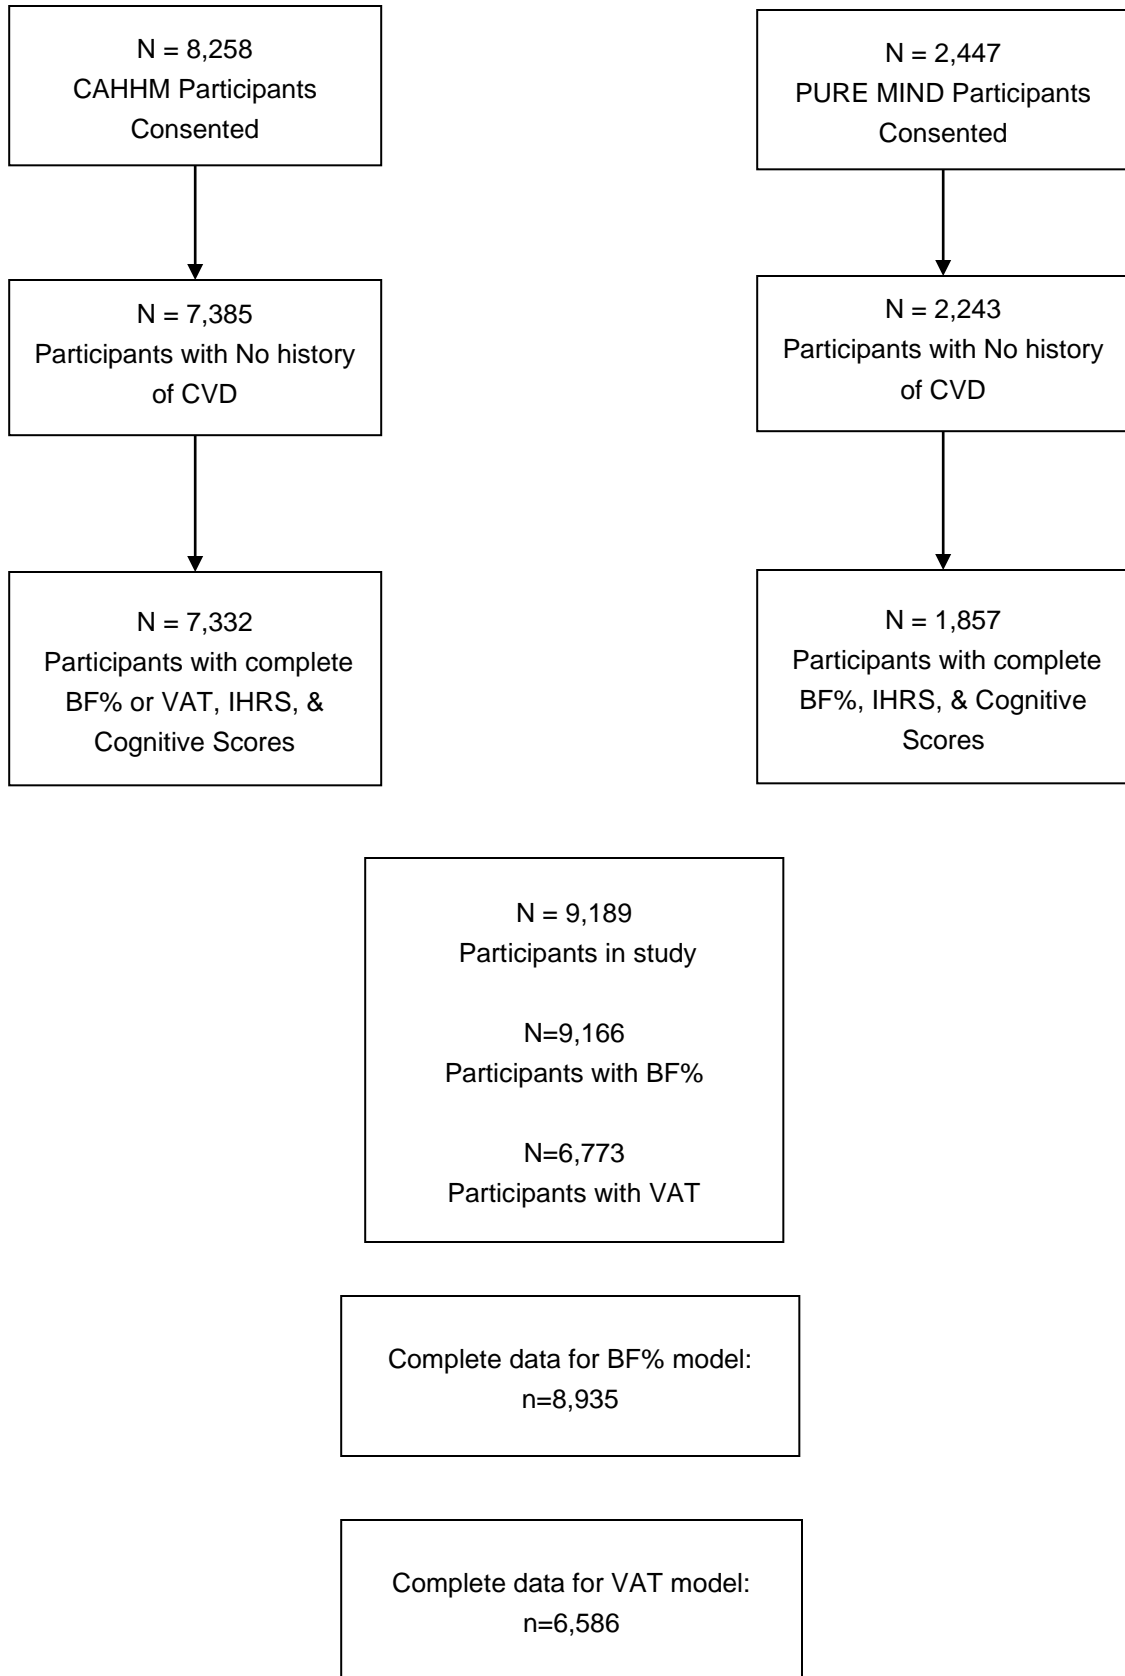

Supplement: jamanetwopen-e2146324-s001.pdf [file jamanetwopen-e2146324-s001.pdf]
